# Supplementary material for: Human Respiratory Syncytial Virus Epidemiological Burden in Pediatric Outpatients in Italy: A Systematic Review
Source: MDPI journal article supplement (doi:10.3390/vaccines11091484), 2023-09-14
Supplement: s1 [file s1]

Supplementary File S3 Table S3: Quality assessment score of individual studies included in the analysis

| References                            | Study period                | Quality assessment score |
|---------------------------------------|-----------------------------|--------------------------|
| Don M, 2005 <sup>29</sup>             | Season 2001/2002            | 0.8/1.0                  |
| Pellegrinelli L, 2020 <sup>30</sup>   | From 2014/2015 to 2017/2018 | 0.8/1.0                  |
| Tramuto F, 2021 <sup>31</sup>         | From 2015/2016 to 2019/2020 | 0.8/1.0                  |
| Van Summeren JJGT, 2021 <sup>32</sup> | Season 2019/2020            | 1.0/1.0                  |
| Rizzo C, 2021 <sup>33</sup>           | Season 2019/2020            | 1.0/1.0                  |
| Pellegrinelli L, 2022 <sup>34</sup>   | From 2014/2015 to 2020/2021 | 0.8/1.0                  |
