# Supplementary material for: Human Respiratory Syncytial Virus Epidemiological Burden in Pediatric Outpatients in Italy: A Systematic Review
Source: MDPI journal article supplement (doi:10.3390/vaccines11091484), 2023-09-14
Supplement: s1 [file s1]

Supplementary File S2 Table S2: Quality scoring criteria

| Category             | Questions                                                                         | Scoring criteria                                                                                                                                                                                                                                          |
|----------------------|-----------------------------------------------------------------------------------|-----------------------------------------------------------------------------------------------------------------------------------------------------------------------------------------------------------------------------------------------------------|
| Study design         | Q1. Whether cases were prospectively enrolled?                                    | <ul style="list-style-type: none"> <li>• Yes – <b>1 point</b></li> <li>• No/unclear – 0 points</li> </ul>                                                                                                                                                 |
| Study subjects       | Q2. Any subgroup(s) exclusion that may have affected estimates?                   | <ul style="list-style-type: none"> <li>• No – <b>1 point</b></li> <li>• Yes/unclear – 0 points (e.g., excluding neonates)</li> </ul>                                                                                                                      |
| Case definition      | Q3. Whether common/standard definitions were used?                                | <ul style="list-style-type: none"> <li>• Yes – <b>1 point</b></li> <li>• No/unclear – 0 points</li> </ul>                                                                                                                                                 |
| Sampling strategy    | Q4. What is the proportion of eligible cases that were tested for RSV?            | <ul style="list-style-type: none"> <li>• <math>\geq 90\%</math> – <b>1 point</b></li> <li>• <math>&lt; 90\%</math> but a systematic sample of eligible cases were tested – <b>1 point</b></li> <li>• <math>&lt; 90\%</math>/unclear – 0 points</li> </ul> |
| Diagnostic test      | Q5. Whether PCR was used for the confirmation of RSV infection?                   | <ul style="list-style-type: none"> <li>• Yes – <b>1 point</b></li> <li>• No/unclear – 0 points</li> </ul>                                                                                                                                                 |
| Statistical analysis | Q6. Was there appropriate statistical analysis, including all needed adjustments? | <ul style="list-style-type: none"> <li>• Yes – <b>1 point</b></li> <li>• No/unclear – 0 points</li> </ul>                                                                                                                                                 |
